# Supplementary material for: Diverse mixed-ligand metal complexes with in situ generated 5-(pyrazinyl)tetrazolate chelating-bridging ligand: in situ synthesis, crystal structures, magnetic and luminescent properties
Source: Royal Society of Chemistry journal article supplement (doi:10.1039/c000586j), 2010-09-03
Supplement: c000586j.pdf [file c000586j.pdf]

**Diverse mixed-ligand metal complexes with *in situ* generated  
5-(pyrazinyl)tetrazolate chelating-bridging ligand: *in situ* synthesis, crystal  
structures, magnetic, and luminescent properties**

En-Cui Yang\*, Yan Feng, Zhong-Yi Liu, Tian-Yu Liu, and Xiao-Jun Zhao\*

*College of Chemistry and Life Science, Tianjin Key Laboratory of Structure and Performance for Functional  
Molecule, Tianjin Normal University, Tianjin 300387, People's Republic of China*

**Table S1.** Selected Hydrogen Bond Lengths (Å) and Bond Angles (°) <sup>a</sup>

| D–H···A                    | <i>d</i> (D–H) | <i>d</i> (H···A) | <i>d</i> (D···A) | ∠DHA   |
|----------------------------|----------------|------------------|------------------|--------|
| <b>2</b>                   |                |                  |                  |        |
| O4–H4···O2 <sup>#1</sup>   | 0.820          | 1.870            | 2.683(2)         | 171.42 |
| O5–H5A···N6 <sup>#2</sup>  | 0.850          | 2.093            | 2.899(2)         | 158.02 |
| O5–H5B···O2 <sup>#3</sup>  | 0.850          | 2.134            | 2.971(3)         | 168.30 |
| <b>4</b>                   |                |                  |                  |        |
| O1–H1A···N12 <sup>#1</sup> | 0.849          | 2.297            | 3.046(1)         | 147.29 |
| <b>5</b>                   |                |                  |                  |        |
| O1–H1A···N4 <sup>#1</sup>  | 0.850          | 2.008            | 2.791(7)         | 152.78 |
| O1–H1B···N2 <sup>#2</sup>  | 0.850          | 2.116            | 2.887(0)         | 150.60 |
| <b>7</b>                   |                |                  |                  |        |
| O1–H1B···I1 <sup>#1</sup>  | 0.851          | 2.834            | 3.670(9)         | 168.15 |
| O1–H1A···N4 <sup>#2</sup>  | 0.851          | 1.937            | 2.779(9)         | 170.39 |
| <b>8</b>                   |                |                  |                  |        |
| O1–H1A···N6 <sup>#1</sup>  | 0.850          | 2.040            | 2.833(2)         | 155.03 |
| O1–H1B···N4 <sup>#2</sup>  | 0.850          | 2.041            | 2.837(3)         | 155.55 |
| O2–H2A···N3 <sup>#3</sup>  | 0.850          | 2.345            | 3.173(4)         | 164.81 |
| O2–H2B···O1 <sup>#2</sup>  | 0.850          | 2.535            | 3.055(2)         | 120.51 |
| O2–H2B···N1 <sup>#2</sup>  | 0.850          | 2.663            | 3.399(1)         | 145.64 |
| <b>9</b>                   |                |                  |                  |        |
| O1–H1A···N6 <sup>#1</sup>  | 0.850          | 1.992            | 2.841(7)         | 179.20 |
| O1–H1B···N4 <sup>#2</sup>  | 0.850          | 1.991            | 2.824(9)         | 166.51 |
| O2–H2A···O1 <sup>#2</sup>  | 0.851          | 2.225            | 3.053(4)         | 164.66 |

Symmetry Codes for **2**: #1  $-x + 2, -y + 1, -z + 1$ , #2  $x, y + 1, z$ , #3  $x - 1, y, z$ , for **4**: #1  $-x + 1, y + 1/2, -z + 1/2$ , for **5**: #1  $-x + 1, y + 1/2, -z + 1/2$ , #2  $x - 1, y, z$ ; for **7**: #1  $-x + 1, -y + 1/2, -z + 1/2$ , #2  $x + 1, y, z$ , for **8**: #1  $-x + 1/2, y - 1/2, -z + 1/2$ , #2  $x + 1/2, -y + 3/2, z + 1/2$ , #3  $x + 1, y, z + 1$ , for **9**: #1  $-x + 1, y - 1/2, -z + 1/2$ , #2  $x, -y + 1/2, z - 1/2$ .

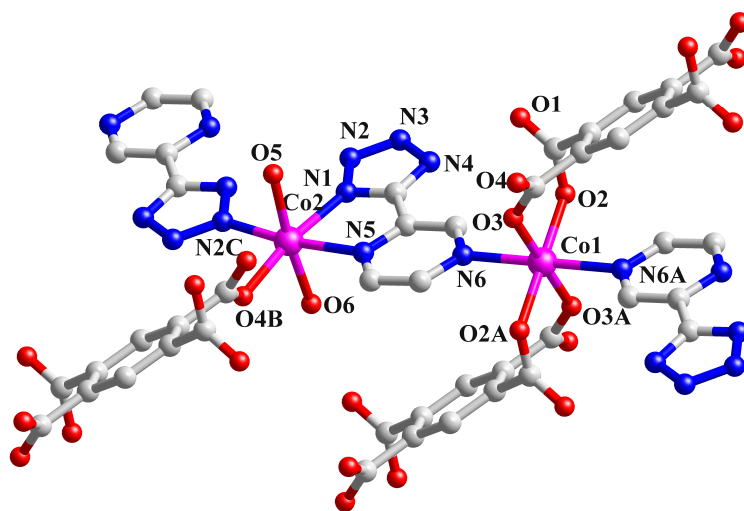

**Figure S1.** Local coordination environments of the Co<sup>II</sup> ions in **1**.

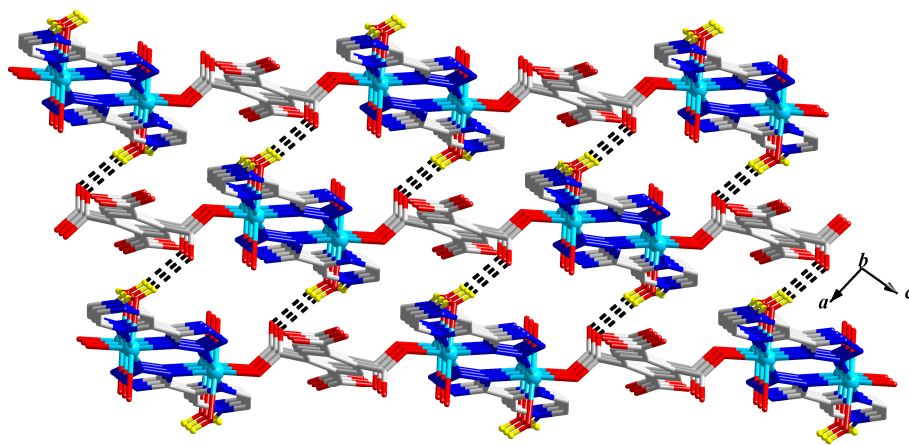

Figure S2. 3D supramolecular network of **2**.

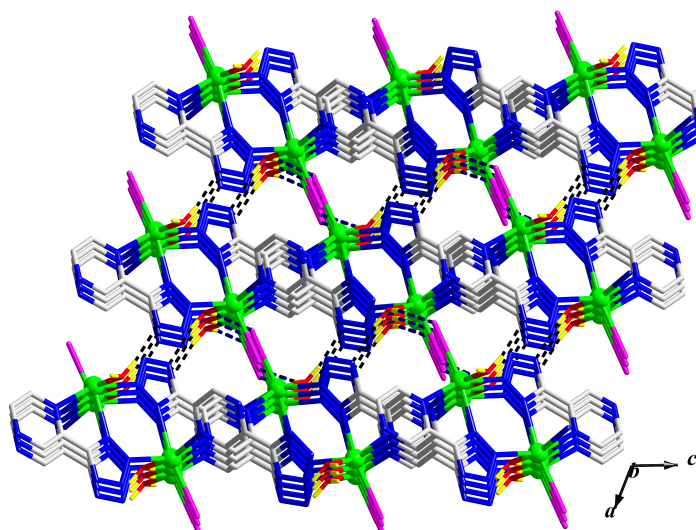

**Figure S3.** 3D supramolecular framework of **7**.

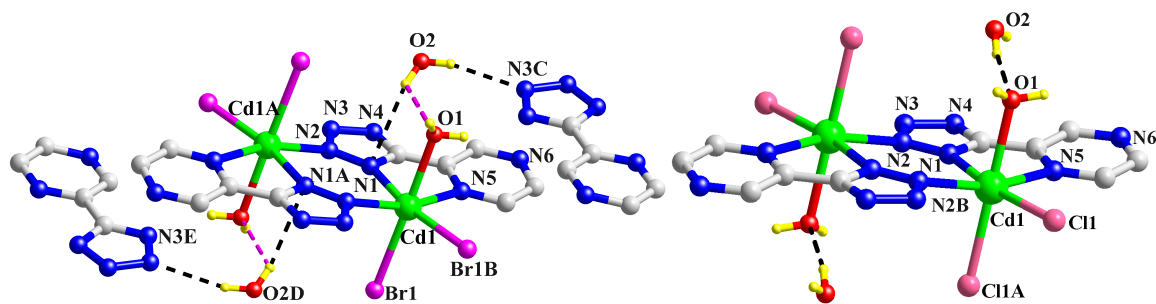

**Figure S4.** Local hydrogen-bonding interactions between the lattice water molecules and covalent chain of **8** (left) and **9** (right).

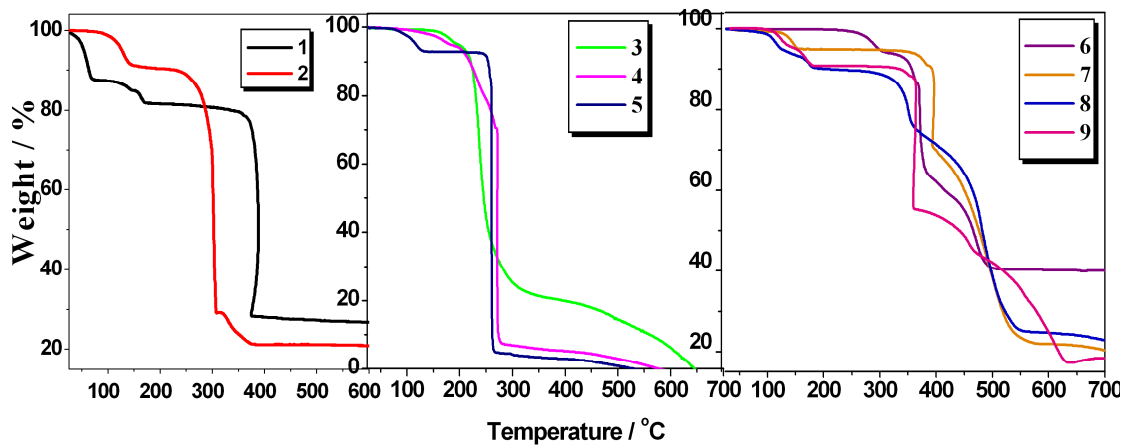

Figure S5. TG curves for complexes 1 – 9.
